# Supplementary material
Source: PubMed Central journal article supplement (PMC6936690)
Supplement: pnas.1915974116.sapp.pdf [file pnas.1915974116.sapp.pdf]

4 **Supplementary Figure 1: PCR products from in-sense primers across recombinase**  
5 **sites reveal reverted transgenes in AAV genomes and plasmids**

6 (A) PCR experiments using four sets of primers with either sense or antisense orientation  
7 in reference to the expected design (top) of the template pAAV-nef-DIO-FlpO plasmid.  
8 Antisense primers (lanes 2 and 5) produce a band at the expected size. In-sense primer  
9 pairs (lanes 3 and 6) produce doublet or triplet bands less 1kb. Cre-recognition site pairs  
10 labelling each band (bottom right) indicate the lox sites across which recombination  
11 occurred to produce the sequence found for each of these bands. The sequences in (B) and  
12 (C) are from the band found in the dotted box in (A) using the flp-specific primers shown.  
13 (D) PCR of FLEX and DIO AAV genomes using in-sense primers across recombinant  
14 sites creates short band doublets. General recombinase-dependent DIO or FLEX AAV  
15 design (top) with in-sense PCR primers (black). Gel of PCR products using the AAVs  
16 listed with sources (below). Dotted box in lane 2 denotes products used for sequencing.  
17 Sequencing of (E) larger and (F) smaller of the two bands show the transgene in-sense with  
18 the WPRE element and separated by three or one recombinase sites (triangles).

19

20

21

22

23

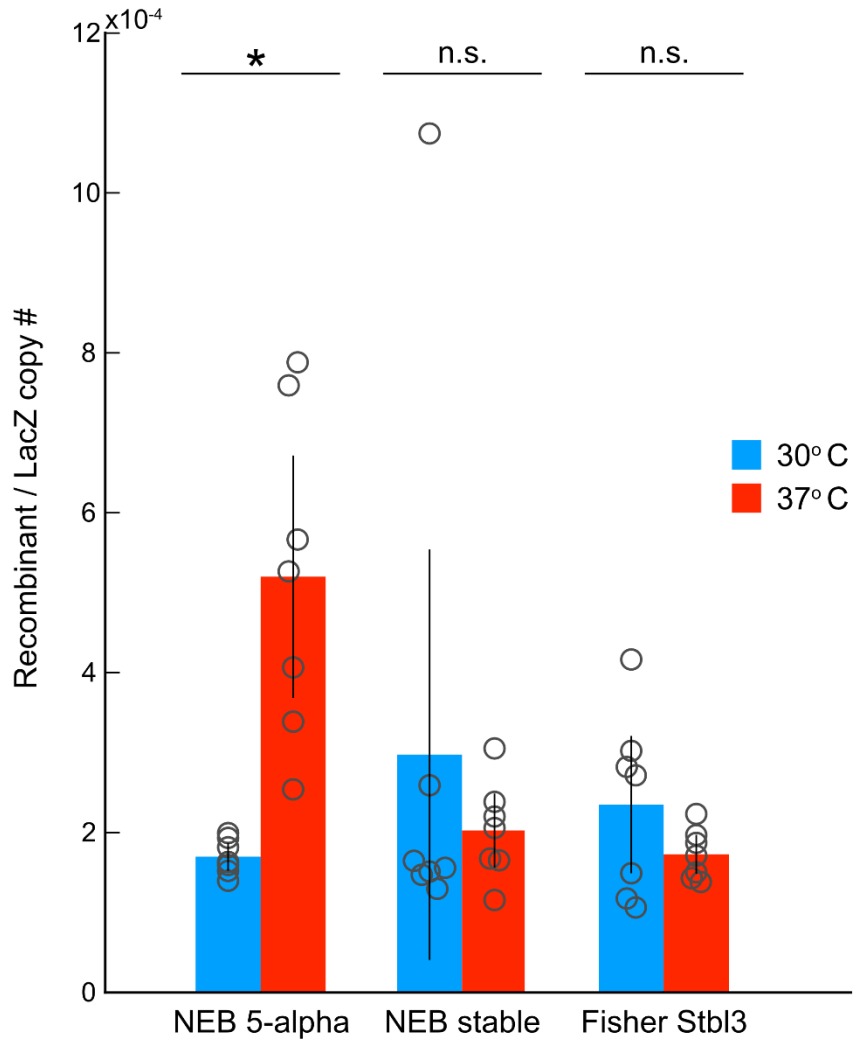

24 **Supplementary Figure 2: Effects of incubation temperature on spontaneous**  
25 **recombination rates across *loxP* sites in competent cell lines used for AAV plasmid**  
26 **production.**

27 Recombination rates in minipreps of pUC19-*loxP*-inv\_LacZ plasmids grown at 30°C for  
28 21hrs or at 37°C for 16hrs as measured by qPCR. N=7 per condition. P values for to be  
29 0.00068 for NEB 5-alpha, 0.4875 for NEB stable, and 0.1911 for Fisher Stbl3 using a two-  
30 tailed independent t-test.

31

A

| Cre                          |                                      |                                      |
|------------------------------|--------------------------------------|--------------------------------------|
|                              | Position 1                           | Position 2                           |
| loxp                         | ATAACTTCGTATA GCATACAT TATACGAAGTTAT | ATAACTTCGTATA GCATACAT TATACGAAGTTAT |
| lox2722                      | ATAACTTCGTATA GGATACIT TATACGAAGTTAT | ATAACTTCGTATA GGATACIT TATACGAAGTTAT |
| loxn                         | ATAACTTCGTATA GTATACCT TATACGAAGTTAT | ATAACTTCGTATA GTATACCT TATACGAAGTTAT |
| loxp <sup>66/71</sup>        | ATAACTTCGTATA GCATACAT TATACGAACGGTA | TACCGTTCGTATA GCATACAT TATACGAAGTTAT |
| loxp <sup>75/76</sup>        | ATAACTTCGTATA GCATACAT TATACGCCCGGTA | TACCGGGCGTATA GCATACAT TATACGAAGTTAT |
| loxp <sup>43/44</sup>        | ATAACTTCGTATA GCATACAT TATAGGTACCGAG | AATGCATGCTATA GCATACAT TATACGAAGTTAT |
| loxp/2722                    | ATAACTTCGTATA GCATACAT TATACGAAGTTAT | ATAACTTCGTATA GGATACIT TATACGAAGTTAT |
| Flp                          |                                      |                                      |
|                              | Position 1                           | Position 2                           |
| frt                          | GAAGTTCCTATTC TCTAGAAA GTATAGGAAGTTC | GAAGTTCCTATTC TCTAGAAA GTATAGGAAGTTC |
| F3                           | GAAGTTCCTATTC TTCAAATA GTATAGGAAGTTC | GAAGTTCCTATTC TTCAAATA GTATAGGAAGTTC |
| F5                           | GAAGTTCCTATTC TTCAAAG GTATAGGAAGTTC  | GAAGTTCCTATTC TTCAAAG GTATAGGAAGTTC  |
| frtRE/LE                     | GAAGTTCATATTC TCTAGAAA GTATAGGAAGTTC | GAAGTTCCTATTC TCTAGAAA GTATAGGAAGTTC |
| Controls                     |                                      |                                      |
|                              | Position 1                           | Position 2                           |
| homologous shuffle (HS)      | AAATTCGATGAATACATTATGAGCTTACTCAATT   | AAATTCGATGAATACATTATGAGCTTACTCAATT   |
| non-homologous shuffle (NHS) | ATATCTAATAGACCGTAATAGTAGTACATTTTAT   | ACCTTAGCAGAAATTCATATTATTAAGTCTAGTC   |

Within-pairs sequence differences

B

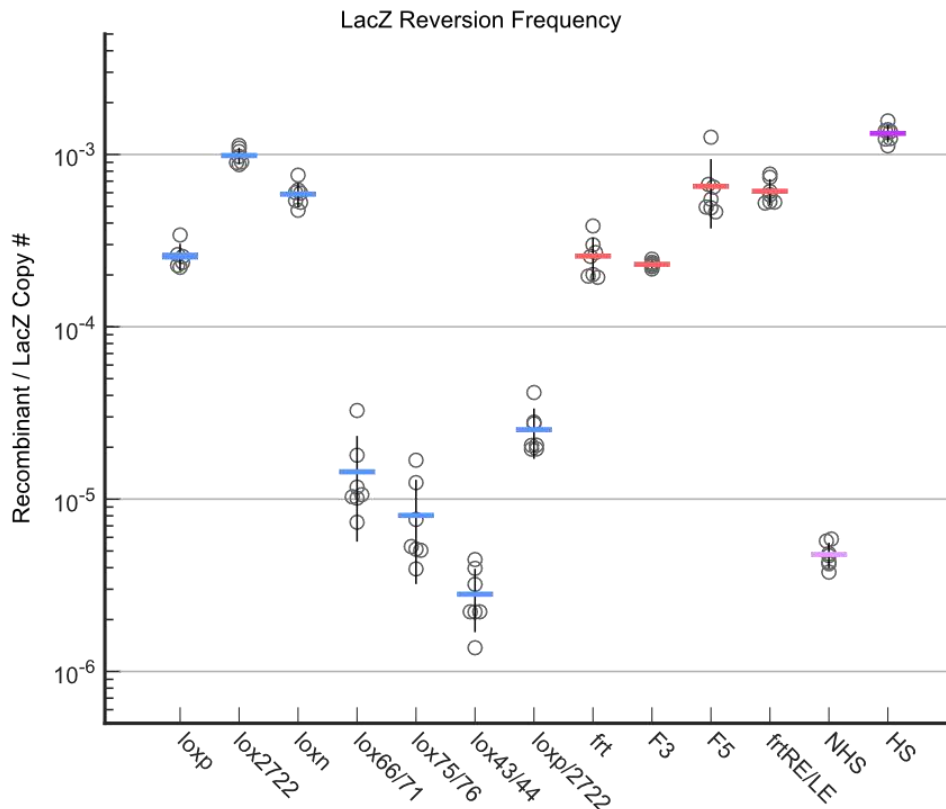

33 **Supplementary Figure 3: All tested recombinase recognition site pairs and associated**  
34 **recombination rates as measured by qPCR**

35 (A) Table of recombination recognition site pairs used to bookend inverted LacZ sequences  
36 in pUC19 experiments. Red text signifies within-pair sequence differences. (B)  
37 Accumulated LacZ recombination frequencies of all tested recombination recognition site  
38 pairs. Horizontal lines signify mean value across minipreps (circles), and vertical lines are  
39 standard deviation.

40

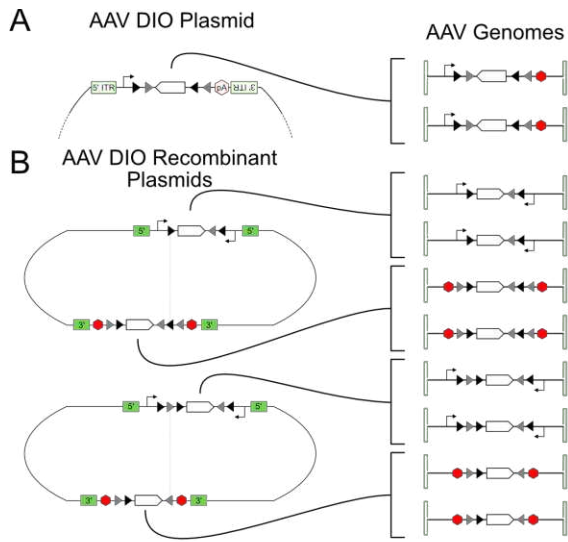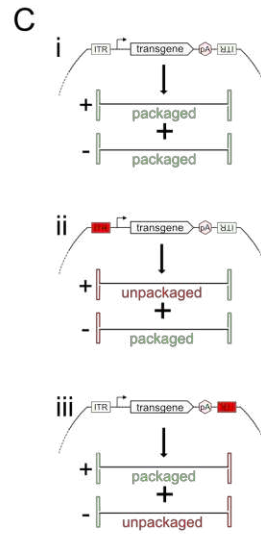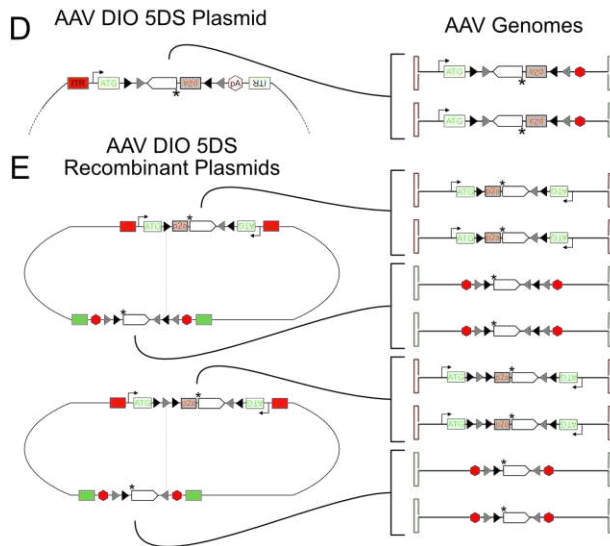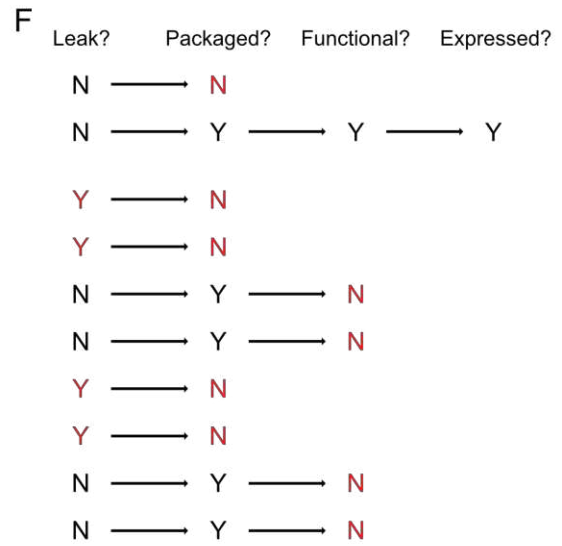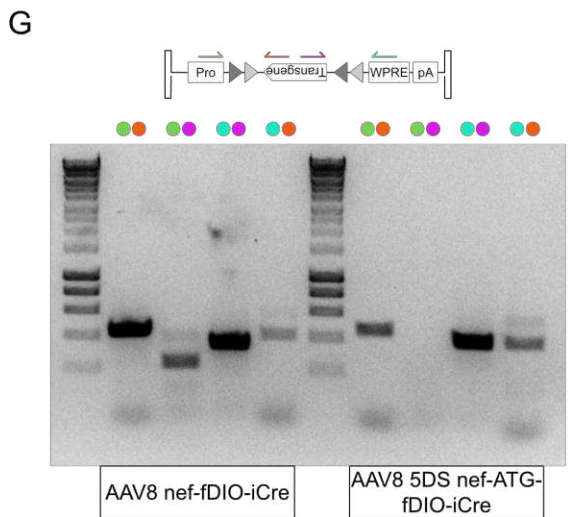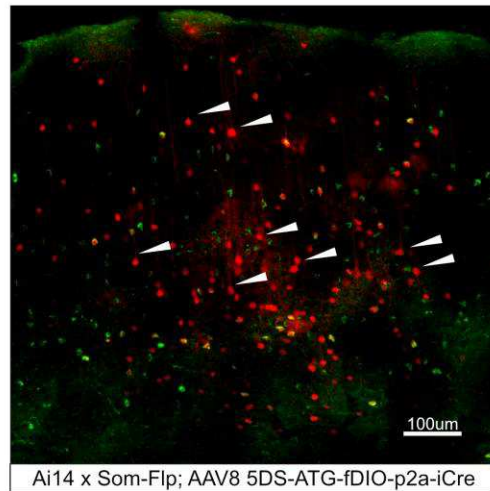

42

43 **Supplementary Figure 4: Disruption of 5' ITR D-sequence packaging signal blocks**  
44 **AAV packaging of genomes containing reverted transgenes but not leak expression**

45 (A) Typical recombinase dependent AAV plasmid design and AAV genome. (B)  
46 Expected first-order recombinant plasmids and resultant AAV genomes resulting from  
47 recombination events across like recombinase-recognition sites. (C) Packaging profile of  
48 ssDNA AAV genomes from plasmids containing unmodified ITR D-sequences (i), 5'  
49 modified ITR (ii, in red), and 3' modified ITR (iii, in red). (D) Plasmid design and resulting  
50 AAV genomes from a recombinase-dependent AAV design with both a disrupted ORF and  
51 5' ITR modified D-sequence, in red. (E) Expected first-order recombinant plasmids and  
52 resultant AAV genomes from the plasmid in (D). (F) Flowchart of each AAV genomes'  
53 propensity to leak, be packaged, and functionally express the transgene in the presence of  
54 recombinase. (G) PCR of AAV genomes using primers targeting all possible transgene  
55 orientations following recombination. Templates, listed at bottom, are AAV8 nef-fDIO-  
56 iCre and the ITR modified AAV8 5DS-nef-ATG-fDIO-iCre. (H) Example image of an  
57 AAV8-5DS-ATG-fDIO-p2a-iCRE injection in primary visual cortex of an Ai14 x SomFlp  
58 mouse. White arrows indicate off target non-somatostatin cre expression. Anti-  
59 somatostatin staining in green, tdTomato in red.

60
